# Supplementary material for: Ni/CdS/TiO2 nanotube array heterostructures for high performance photoelectrochemical biosensing
Source: Royal Society of Chemistry journal article supplement (doi:10.1039/c4ta07190e), 2015-01-01
Supplement: c4ta07190e1.pdf [file c4ta07190e1.pdf]

## Supporting Information

### Ni/CdS/TiO<sub>2</sub> nanotube array heterostructures for high performance photoelectrochemical biosensing

Huanhuan Huo, Zhaodong Xu, Ting Zhang, Cailing Xu\*

State Key Laboratory of Applied Organic Chemistry, Key Laboratory of Special Function

Materials and Structure Design Ministry of Education, College of Chemistry and Chemical

Engineering, Lanzhou University, Lanzhou 730000, China

\*Corresponding author:

Cailing Xu: Tel: +86-931-891-2589, FAX: +86-931-891-2582, Email: [xucl@lzu.edu.cn](mailto:xucl@lzu.edu.cn)

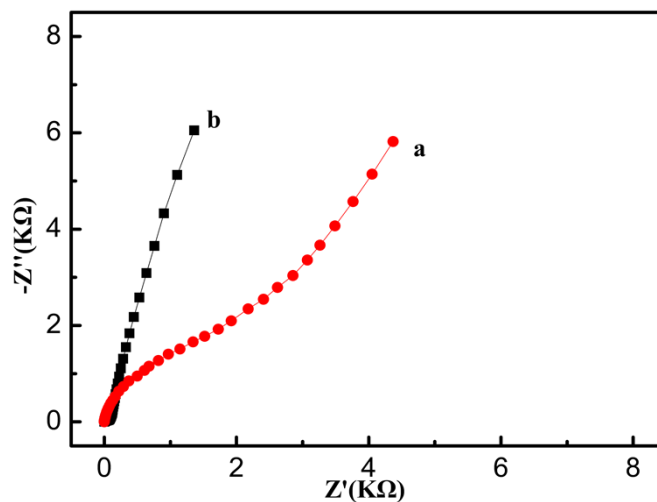

Fig. S1 Nyquist plots of electrochemical impedance spectroscopy (EIS) in the frequency range 0.01 to 100 kHz of the (a) CdS/TiO<sub>2</sub> NTAs electrode and the (b) Ni/CdS/TiO<sub>2</sub> NTAs electrode.

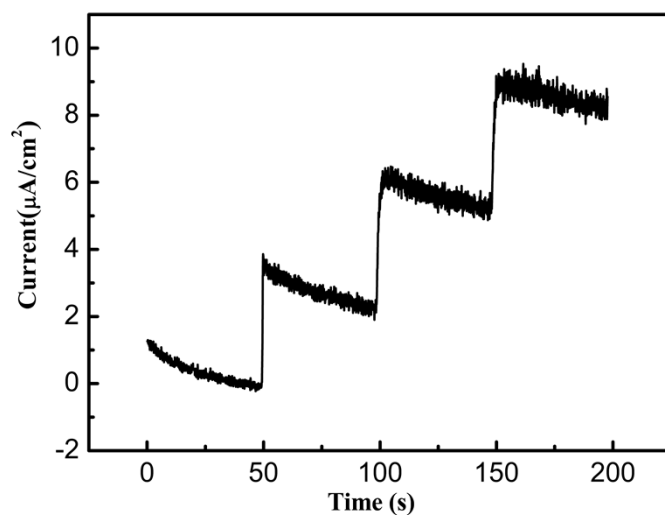

Fig. S2 Amperometric response of Ni/CdS/TiO<sub>2</sub> NTAs electrode at 0.3 V in 1.0 M KOH electrolyte with successive additions of 2.0 mM glucose.

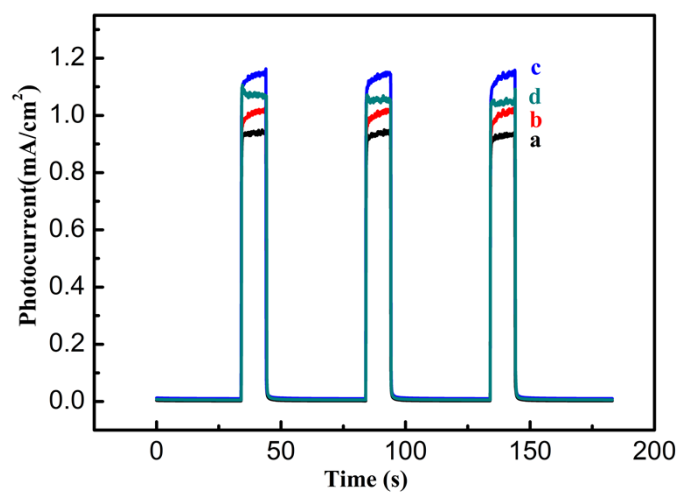

Fig. S3 Photocurrent responses of CdS/TiO<sub>2</sub> NTAs electrode (a) and Ni/CdS/TiO<sub>2</sub> NTAs electrode with different deposition electric quantity of Ni 0.03 C (b), 0.05 C (c), and 0.1 C (d) in 1.0 M KOH at a bias voltage of 0.3 V under a simulated sunlight illumination.

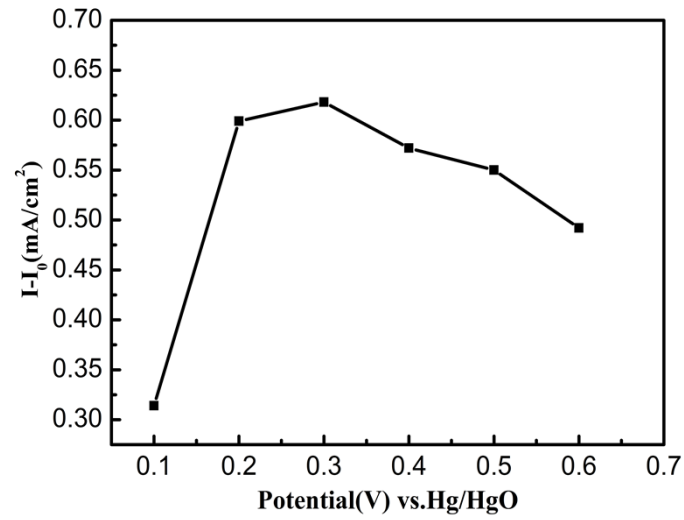

Fig. S4 Effects of applied potentials on photocurrent responses of Ni/CdS/TiO<sub>2</sub> NTAs electrode in 1.0 M KOH in the absence and presence of 1 mM glucose ( $I_0$  and  $I$  are the photocurrents of the Ni/CdS/TiO<sub>2</sub> NTAs electrode before and after addition of glucose).
